# Supplementary material for: Functional Characterization of 17 Protein Serine/Threonine Phosphatases in Toxoplasma gondii Using CRISPR-Cas9 System
Source: Frontiers journal article supplement (doi:10.3389/fcell.2021.738794), 2022-01-10
Supplement: Data_Sheet_3.ZIP [file Data_Sheet_3.ZIP]

## Sheet: 工作表1
Figure6-A	RH	RHΔpp5	RHΔpp7	RHΔefpp	RHΔslp	RHΔm3f	RHΔm4	RHΔm5a	RHΔm5b	RHΔm6	RHΔm8	RHΔm9	RHΔm12	RHΔm14	RHΔm18	RHΔctd1	RHΔctd2	RHΔctd3
8	1
9	1
9	1
9	1
10	1
11	1
8		1
8		1
9		1
9		1
11		1
11		1
10			1
11			1
12			1
13			1
13			1
14			1
8				1
9				1
9				1
10				1
11				1
11				1
8					1
9					1
9					1
9					1
10					1
11					1
9						1
9						1
9						1
9						1
10						1
11						1
8							1
8							1
9							1
9							1
11							1
11							1
8								1
9								1
9								1
10								1
11								1
11								1
9									1
9									1
9									1
9									1
10									1
11									1
8										1
8										1
8										1
9										1
11										1
11										1
8											1
8											1
9											1
10											1
10											1
10											1
8												1
9												1
9												1
10												1
11												1
11												1
8													1
8													1
9													1
9													1
9													1
10													1
9														1
9														1
9														1
10														1
10														1
10														1
8															1
8															1
9															1
10															1
10															1
10															1
8																1
9																1
9																1
9																1
9																1
11																1
9																	1
9																	1
9																	1
10																	1
11																	1
11																	1
8																		1
9																		1
9																		1
10																		1
11																		1
11																		1
Figure6-B	RH	RHΔPP7
8	1
9	1
9	1
9	1
10	1
11	1
10		1
11		1
12		1
13		1
13		1
14		1
Figure6-C	Pru	PruΔslp	PruΔpp7
10	1
11	1
11	1
12	1
12	1
12	1
13	1
30	0
30	0
30	0
11		1
11		1
11		1
12		1
12		1
13		1
13		1
30		0
30		0
30		0
15			1
16			1
17			1
30			0
30			0
30			0
30			0
30			0
30			0
30			0
Figure6-D	Pru	PruΔpp7
12	1
13	1
14	1
14	1
15	1
30	0
30	0
30	0
30	0
30	0
30		0
30		0
30		0
30		0
30		0
30		0
30		0
30		0
30		0
30		0
Figure6-E/cysts burden
Pru	PruΔslp	PruΔpp7
278	307	223
256	354	234
377	213	178
		267
		189
		178
		222
Figure6-F/cysts burden
Pru	PruΔpp7
223	68
175	155
127	67
148	44
209	85
	88
	112
	90
	55
	59
